# Supplementary material
Source: ML conference proceedings conference paper supplement (https://proceedings.mlr.press/v33/lee14.html)
Supplement: Supplementary file 1 [file lee14-supp.pdf]

to each cluster of the partition:

$$p(\{\theta_i\}_{i=1}^n) = p(\pi, \{\theta_c^*\}_{c \in \pi}) = \frac{\Gamma(\alpha)}{\Gamma(\alpha + n)} \prod_{c \in \pi} \alpha \Gamma(|c|) H(\theta_c^*). \quad (10)$$

The same result can be derived using **Theorem 2** of in our paper. By **Theorem 2**, the joint probability of  $\{\theta_i\}$  and auxiliary variable  $\xi$  is

$$p(\pi, \{\theta_c^*\}, \xi) = \frac{\xi^{n-1} e^{-\psi_\rho(\xi)}}{\Gamma(n)} \prod_{c \in \pi} \kappa_\rho(|c|, \xi) H(\theta_c^*). \quad (11)$$

In case of DP,  $\psi_\rho(\xi)$  and  $\kappa_\rho(|c|, \xi)$  are computed as

$$\psi_\rho(\xi) = \int_{\mathbb{R}^+} (1 - e^{-\xi w}) \alpha w^{-1} e^{-w} dw = \alpha \log(1 + \xi) \quad (12)$$

$$\kappa_\rho(|c|, \xi) = \int_{\mathbb{R}^+} w^{|c|} e^{-\xi w} \alpha w^{-1} e^{-w} dw = \frac{\alpha \Gamma(|c|)}{(1 + \xi)^{|c|}}. \quad (13)$$

Hence, we have

$$\begin{aligned} p(\pi, \{\theta_c^*\}, \xi) &= \frac{\xi^{n-1}}{\Gamma(n)(1 + \xi)^{n+\alpha}} \prod_{c \in \pi} \alpha \Gamma(|c|) H(\theta_c^*) \\ &= \left( \frac{\xi}{1 + \xi} \right)^{n-1} \left( \frac{1}{1 + \xi} \right)^{\alpha+1} \frac{1}{\Gamma(n)} \prod_{c \in \pi} \alpha \Gamma(|c|) H(\theta_c^*). \end{aligned} \quad (14)$$

Let  $\xi/(1 + \xi) = v$ . Then

$$\begin{aligned} p(\pi, \{\theta_c^*\}) &= \int p(\pi, \{\theta_c^*\}, \xi) d\xi \\ &= \int v^{n-1} (1 - v)^{\alpha+1} \frac{1}{\Gamma(n)} \prod_{c \in \pi} \alpha \Gamma(|c|) H(\theta_c^*) \frac{1}{(1 - v)^2} dv \\ &= \frac{1}{\Gamma(n)} \prod_{c \in \pi} \alpha \Gamma(|c|) H(\theta_c^*) \int v^{n-1} (1 - v)^{\alpha-1} dv \\ &= \frac{\Gamma(\alpha)}{\Gamma(n + \alpha)} \prod_{c \in \pi} \alpha \Gamma(|c|) H(\theta_c^*). \end{aligned} \quad (15)$$

Combined with the likelihood  $L$ , the joint probability of DPM is then written as:

$$p(\mathbf{X}, \pi, \{\theta_c^*\}_{c \in \pi}) = \frac{\Gamma(\alpha)}{\Gamma(\alpha + n)} \prod_{c \in \pi} \alpha \Gamma(|c|) L(\mathbf{X}^{(c)} | \theta_c^*) H(\theta_c^*), \quad (16)$$

and the marginal likelihood of  $\mathbf{X}$  is

$$p(\mathbf{X}) = \frac{\Gamma(\alpha)}{\Gamma(\alpha + n)} \sum_{\pi} \prod_{c \in \pi} \alpha \Gamma(|c|) p(\mathbf{X}^{(c)} | \mathcal{H}_c). \quad (17)$$

## 2 Completely Random Measure

In this section, we provide more specific backgrounds on completely random measures (CRMs). Let us consider a measure space  $(\Theta, \Omega)$ , where  $\Omega$  is the  $\sigma$ -algebra of  $\Theta$ . A random measure  $\mu$  on  $(\Theta, \Omega)$  is a random variable whose values are measures on  $(\Theta, \Omega)$ .

**Definition 1.** A random measure  $\mu$  on  $(\Theta, \Omega)$  is **completely random** if for any disjoint  $A_1, \dots, A_n \subset \Theta$ , the random variables  $\mu(A_1), \dots, \mu(A_n)$  are independent.

It has been shown [1] that a CRM is decomposed into the sum of three independent components: (1) a nonrandom measure; (2) a countable collection of nonnegative random masses at fixed locations, and (3) a countable collection of nonnegative random masses at random locations.

**Theorem 1.** ([1]) A CRM  $\mu$  is decomposed into the sum of three independent components:

$$\begin{aligned} \mu &= \mu_0 + \sum_j v_j \delta_{\theta_j^*} + \int_{\mathbb{R}^+} w \Pi(dw, \theta) \\ &= \mu_0 + \sum_j v_j \delta_{\theta_j^*} + \sum_k w_k \delta_{\theta_k}, \end{aligned} \quad (18)$$

where  $\mu_0$  is a nonrandom measure,  $\{v_j\}$  are mutually independent random variables on  $\mathbb{R}^+$  corresponding to random weights of fixed atoms  $\{\theta_j^*\}$  of  $\Theta$ , and  $\Pi = \sum_k \delta_{(w_k, \theta_k)}$  is a Poisson process defined on a product space  $\mathbb{R}^+ \times \Theta$  with Lévy intensity  $\lambda(dw, d\theta)$ .

**Definition 2.** A CRM  $\mu$  is said to be **homogeneous** if the Lévy intensity  $\lambda$  of the underlying Poisson process  $\Pi$  decomposes into a product of two intensities:

$$\lambda(dw, d\theta) = \rho(dw)H(d\theta). \quad (19)$$

Throughout this article, we consider only homogeneous CRMs without nonrandom measures and fixed atoms, and we write

$$\mu = \int_{\mathbb{R}^+} \Pi(dw, \theta) = \sum_k w_k \delta_{\theta_k} \sim \text{CRM}(\rho, H). \quad (20)$$

Without loss of generality, we assume that  $\int_{\Theta} H(d\theta) = 1$ . We also assume that  $\rho$  satisfies the following two conditions

$$\int_{\mathbb{R}^+} \rho(dw) = \infty, \quad \int_{\mathbb{R}^+} (1 - e^{-w})\rho(dw) < \infty, \quad (21)$$

where the first condition ensures that  $\mu$  has infinite atoms ( $\mu = \sum_{k=1}^{\infty} w_k \delta_{\theta_k}$ ), and the second condition ensures that the total mass  $\mu(\Theta) = \sum_{k=1}^{\infty} w_k$  is finite [2].

## 3 Posterior Analysis of Normalized Random Measure Mixture Models

In this section, we provide the proof of **Theorem 2** in our paper. The original proof can be found in [2, 3].

**Theorem 2.** ([2], *Theorem 2 in paper*) Let  $\mu \sim \text{CRM}(\rho, H)$  on  $(\Theta, \Omega)$  and let  $(\pi, \{\theta_c^*\}) \sim \tilde{\mu}$ . Introducing an auxiliary variable  $\xi \sim \text{Gamma}(n, \mu(\Theta))$ , the posterior of  $\mu$  is given by

$$\mu|\xi, \pi, \{\theta_c^*\} = \bar{\mu} + \sum_{c \in \pi_n} w_c \delta_{\theta_c^*}, \quad (22)$$

where

$$\bar{\mu} \sim \text{CRM}(\bar{\rho}, H), \quad \bar{\rho}(dw) \stackrel{\text{def}}{=} e^{-\xi w} \rho(dw),$$

and the posterior density over random weights of fixed atoms is given by

$$\begin{aligned} p(w_c | \xi, \pi, \{\theta_c^*\}) &= \frac{w_c^{|c|} e^{-\xi w_c} \rho(w_c)}{\kappa_\rho(|c|, \xi)}, \\ \kappa_\rho(m, \xi) &\stackrel{\text{def}}{=} \int_{\mathbb{R}^+} w^m e^{-\xi w} \rho(dw). \end{aligned}$$

The marginal distribution is given by

$$\begin{aligned} p(\pi, \{\theta_c^*\}, \xi) &= \frac{\xi^{n-1} e^{-\psi_\rho(\xi)}}{\Gamma(n)} \prod_{c \in \pi} \kappa_\rho(|c|, \xi) H(\theta_c^*), \\ \psi_\rho(\xi) &\stackrel{\text{def}}{=} \int_{\mathbb{R}^+} (1 - e^{-\xi w}) \rho(dw). \end{aligned}$$

The predictive distribution is given by

$$\theta | \xi, \pi, \{\theta_c^*\} \propto \kappa_\rho(1, \xi) H + \sum_{c \in \pi} \frac{\kappa_\rho(|c| + 1, \xi)}{\kappa_\rho(|c|, \xi)} \delta_{\theta_c^*}.$$

*Proof.* The likelihood of  $(\pi, \{\theta_c^*\}_{c \in \pi})$  given  $\mu$  is

$$p(\pi, \{\theta_c^*\}_{c \in \pi} | \mu) = \mu(\Theta)^{-n} \prod_{c \in \pi} w_c^{|c|}, \quad (23)$$

where  $w_c$  is a mass of  $\theta_c^*$ . We introduce an auxiliary variable  $\xi$  as follows:

$$\begin{aligned} p(\xi | \mu) &= \text{Gamma}(\xi | n, \mu(\Theta)) \\ p(\pi, \{\theta_c^*\}_{c \in \pi}, \xi | \mu) &= \frac{\xi^{n-1} \exp(-\mu(\Theta)\xi)}{\Gamma(n)} \prod_{c \in \pi} w_c^{|c|}. \end{aligned} \quad (24)$$

We will compute the characteristic functional of the posterior process  $\mu | \pi, \{\theta_c^*\}_{c \in \pi}, \xi$ , which is given as:

$$\mathbb{E} \left[ e^{-\mu(f)} | \pi, \{\theta_c^*\}_{c \in \pi}, \xi \right] = \frac{\mathbb{E}[p(\pi, \{\theta_c^*\}, \xi | \mu) e^{-\mu(f)}]}{\mathbb{E}[p(\pi, \{\theta_c^*\}, \xi | \mu)]}, \quad (25)$$

where  $f$  is an arbitrary bounded function on  $\Theta$  and

$$e^{-\mu(f)} \stackrel{\text{def}}{=} \exp \left\{ - \int f(\theta) \mu(d\theta) \right\}. \quad (26)$$

The denominator is a special case of the numerator when  $f = 0$ , so we first compute the numerator. Let  $\Pi$  be the underlying Poisson process of  $\mu$ .

$$\begin{aligned} &\mathbb{E} \left[ p(\pi, \{\theta_c^*\}, \xi | \mu) e^{-\mu(f)} \right] \\ &= \frac{\xi^{n-1}}{\Gamma(n)} \mathbb{E} \left[ \exp \left\{ - \int w(f(\theta) + \xi) \Pi(dw, d\theta) \right\} \prod_{c \in \pi} w_c^{|c|} \right] \end{aligned} \quad (27)$$

By applying the Palm formula or by **Lemma 2** in [4], we get

$$\propto \mathbb{E} \left[ \exp \left\{ - \int w(f(\theta) + \xi) \Pi(dw, d\theta) \right\} \right] \prod_{c \in \pi} H(\theta_c^*) \int w_c^{|c|} \exp\{-w_c(f(\theta_c^*) + \xi)\} \rho(w_c) \quad (28)$$

By the Campbell's formula [5], this is computed as

$$= \exp \left\{ \int (e^{-w(f(\theta) + \xi)} - 1) \rho(dw) H(d\theta) \right\} \prod_{c \in \pi} H(\theta_c^*) \int w_c^{|c|} \exp\{-w_c(f(\theta_c^*) + \xi)\} \rho(w_c) \quad (29)$$

If we set  $f = 0$ , we get the denominator:

$$\begin{aligned} p(\pi, \{\theta_c^*\}, \xi) &= \mathbb{E}[p(\pi, \{\theta_c^*\}, \xi | \mu)] \propto \exp \left\{ \int (e^{-w\xi} - 1) \rho(dw) H(d\theta) \right\} \prod_{c \in \pi} H(\theta_c^*) \int w_c^{|c|} e^{-w_c \xi} \rho(w_c) \\ &= \frac{\xi^{n-1} e^{-\psi_\rho(\xi)}}{\Gamma(n)} \prod_{c \in \pi} \kappa_\rho(|c|, \xi) H(\theta_c^*). \end{aligned} \quad (30)$$

Now dividing the numerator with the denominator gives

$$\begin{aligned} &\mathbb{E} \left[ e^{-\mu(f)} | \pi, \{\theta_c^*\}_{c \in \pi}, \xi \right] \\ &= \exp \left[ \int (e^{-w(f(\theta) + \xi)} - e^{-w\xi}) \rho(dw) H(d\theta) \right] \prod_{c \in \pi} \int \frac{w_c^{|c|} \exp\{-w_c(f(\theta_c^*) + \xi)\} \rho(dw_c)}{\kappa_\rho(|c|, \xi)} \\ &= \exp \left[ \int (e^{-wf(\theta)} - 1) e^{-w\xi} \rho(dw) H(d\theta) \right] \prod_{c \in \pi} \int \frac{w_c^{|c|} \exp\{-w_c(f(\theta_c^*) + \xi)\} \rho(dw_c)}{\kappa_\rho(|c|, \xi)} \end{aligned} \quad (31)$$

The first term inside the exponential is the characteristic functional of CRM  $\bar{\mu}$  with Lévy measure  $\bar{\rho} = e^{-\xi w} \rho(dw)$ . The second terms inside the product is the characteristic functional of fixed atoms  $\theta_c^*$  with random masses  $w_c$  with distribution

$$p(w_c) = \frac{w_c^{|c|} e^{-\xi w_c} \rho(w_c)}{\kappa_\rho(|c|, \xi)}. \quad (32)$$

□

## 4 Posterior analysis for Mixed Normalized Random Measure Mixtures

In this section, we describe the posterior analysis for mixed normalized random measure (MNRM) mixtures [6]. All the derivations and proofs can be found in the supplementary material of the original paper [4], and here we just rewrite them using our own notations.

### 4.1 Model

Let  $\{\nu_r\}_{r=1}^R$  be mutually independent homogeneous CRMs on  $\Theta$ . As in our paper, we will call these CRMs as *basis CRMs*.

$$\nu_r = \sum_{k=1}^{\infty} w_{rk} \delta_{\theta_{rk}} \sim \text{CRM}(\rho_r, H_r) \text{ for } r = 1, \dots, R. \quad (33)$$

Suppose that we are to model a dataset  $\mathbf{X}_{1:T} = \bigcup_{t=1}^T \mathbf{X}_t$ . The CRM  $\mu_t$  to generate  $\mathbf{X}_t$  is then represented as a mixture of the basis measures as follows:

$$\mu_t = \sum_{r=1}^R q_{t,r} \nu_r \text{ for } t = 1, \dots, T. \quad (34)$$

Now for each data point  $\mathbf{x}_{ti}$ , a parameter  $\theta_{ti}$  is drawn from its corresponding normalized random measure.

$$\{\theta_{ti}\}_{i=1}^{n_t} | \mu_t \stackrel{\text{iid}}{\sim} \tilde{\mu}_t = \mu_t / \mu_t(\Theta). \quad (35)$$

Since all the  $\theta_{ti}$  came from one of the (discrete) basis measures,  $\{\{\theta_{ti}\}_{i=1}^{n_t}\}_{t=1}^T$  induces a partition  $\pi$  of the set of indices  $I_{1:T}$ . Moreover, each cluster  $c$  in  $\pi$  has its own indicator variable  $z_c$  which indicates that the parameter allocated to the cluster  $c$  had come from the basis measure  $\nu_r$ . We write  $\theta_c^*$  as a representation of the parameter allocated to the cluster  $c$ . Also, let  $w_c$  be the weight corresponding to  $\theta_c^*$ .

$$\{\{\theta_{ti}\}_{i=1}^{n_t}\}_{t=1}^T = (\pi, \{z_c, \theta_c^*\}_{c \in \pi}) \quad (36)$$

$$w_c = \nu_{z_c}(\theta_c^*). \quad (37)$$

## 4.2 Posterior processes

The likelihood of  $(\pi, \{z_c, \theta_c^*\})$  given  $\{\nu_r\}$  is written as

$$p(\pi, \{z_c, \theta_c^*\} | \{\nu_r\}) = \prod_{t=1}^T \frac{\prod_{c \in \pi} (q_{tz_c} w_c)^{|c \cap I_{t, n_t}|}}{(\sum_r q_{tr} \nu_r(\Theta))^{n_t}}. \quad (38)$$

Now we introduce a set of auxiliary Gamma variables  $\{\xi_t\}_{t=1}^T$  to obtain closed-form posterior processes.

$$\xi_t | \{\nu_r\} \sim \text{Gamma}\left(n_t, \sum_{r=1}^R q_{t,r} \nu_r(\Theta)\right) \quad (39)$$

$$p(\pi, \{z_c, \theta_c^*\}, \{\xi_t\} | \{\nu_r\}) = \prod_{t=1}^T \frac{\xi_t^{n_t-1}}{\Gamma(n_t)} \prod_{r=1}^R \exp\left(-\nu_r(\Theta) \sum_{t=1}^T q_{t,r} \xi_t\right) \prod_{c \in \pi} \bar{q}_{c, z_c} w_c^{|c|}, \quad (40)$$

where  $\bar{q}_{c z_c} \stackrel{\text{def}}{=} \prod_t q_{tz_c}^{|c \cap I_{t, n_t}|}$ .

**Theorem 3.** *The posterior process  $\nu_r | \pi, \{z_c, \theta_c^*\}, \{\xi_t\}$  is written as*

$$\nu_r | \pi, \{z_c, \theta_c^*\}, \{\xi_t\} = \bar{\nu}_r + \sum_{\substack{c \in \pi \\ z_c = r}} \mathbb{I}[z_c = r] w_c \delta_{\theta_c^*}, \quad (41)$$

where

$$\bar{\rho}_r(dw) \stackrel{\text{def}}{=} \exp\left\{-w \sum_{t=1}^T q_{t,r} \xi_t\right\} \rho_r(dw) \quad (42)$$

$$\bar{\nu}_r \sim \text{CRM}(\bar{\rho}_r, H_r) \quad (43)$$

$$p(w_c | \dots) = \frac{w_c^{|c|} \exp(-w_c \sum_t q_{t,r} \xi_t) \rho_r(w_c)}{\kappa_{\rho_r}(|c|, \sum_t q_{t,r} \xi_t)}. \quad (44)$$

Moreover, the marginal distribution is written as

$$p(\pi, \{z_c, \theta_c^*\}, \{\xi_t\}) = \prod_{t=1}^T \frac{\xi_t^{n_t-1}}{\Gamma(n_t)} \prod_{r=1}^R \exp\left\{-\psi_{\rho_r}\left(\sum_{t=1}^T q_{t,r} \xi_t\right)\right\} \prod_{c \in \pi} \bar{q}_{c, z_c} \kappa_{\rho_r}\left(|c|, \sum_{t=1}^T q_{t, z_c} \xi_t\right) H_{z_c}(\theta_c^*). \quad (45)$$

*Proof.* We will compute the characteristic functional of the process  $\nu_r|\pi, \{z_c, \theta_c^*\}, \{\xi_t\}$  for an arbitrary bounded measurable function  $f$  on  $\Theta$ .

$$\mathbb{E}\left[e^{-\nu_r(f)}|\pi, \{z_c, \theta_c^*\}, \{u_t\}\right] = \mathbb{E}\left[\exp\left\{-\int f(\theta)\nu_r(d\theta)\right\}|\pi, \{z_c, \theta_c^*\}, \{\xi_t\}\right]. \quad (46)$$

One can easily see that this characteristic functional is written as

$$\mathbb{E}\left[e^{-\nu_r(f)}|\pi, \{z_c, \theta_c^*\}, \{\xi_t\}\right] = \frac{\mathbb{E}[p(\pi, \{z_c, \theta_c^*\}, \{\xi_t\})\nu_r]e^{-\nu_r(f)}}{\mathbb{E}[p(\pi, \{z_c, \theta_c^*\}, \{\xi_t\})\nu_r]}, \quad (47)$$

and the denominator is a special case of the numerator when  $f = 0$  for all  $\theta \in \Theta$ . Hence we focus on computing the numerator. Let  $\Pi$  be the underlying Poisson process of  $\nu_r$ .

$$\begin{aligned} & \mathbb{E}\left[p(\pi, \{z_c, \theta_c^*\}, \{\xi_t\})\nu_r e^{-\nu_r(f)}\right] \\ &= \prod_{t=1}^T \frac{\xi_t^{n_t-1}}{\Gamma(n_t)} \prod_{r' \neq r} \exp\left\{-\nu_{r'}(\Theta)\left(\sum_{t=1}^T q_{t,r'}\xi_t\right)\right\} \prod_{c \in \pi} \bar{q}_{c,z_c} \prod_{\substack{c \in \pi \\ z_c \neq r}} w_c^{|c|} \\ & \times \mathbb{E}\left[\exp\left\{-\int w\left(f(\theta) + \sum_{t=1}^T q_{t,r}\xi_t\right)\Pi(dw, d\theta)\right\} \prod_{\substack{c \in \pi \\ z_c=r}} w_c^{|c|}\right]. \end{aligned} \quad (48)$$

By applying the Palm formula or simply by **Lemma 2** in [4], we get

$$\begin{aligned} & \propto \mathbb{E}\left[\exp\left\{-\int w\left(f(\theta) + \sum_{t=1}^T q_{t,r}\xi_t\right)\Pi(dw, d\theta)\right\}\right] \\ & \times \prod_{\substack{c \in \pi \\ z_c=r}} H_r(\theta_c^*) \int w_c^{|c|} \exp\left\{-w_c\left(f(\theta_c^*) + \sum_{t=1}^T q_{t,r}\xi_t\right)\right\} \rho_r(w_c). \end{aligned} \quad (49)$$

By the Campbell's formula [5], the expectation for Poisson process is evaluated as

$$\begin{aligned} &= \exp\left[\int \left[\exp\left\{-w\left(f(\theta) + \sum_{t=1}^T q_{t,r}\xi_t\right)\right\} - 1\right] \rho_r(dw) H_r(d\theta)\right] \\ & \times \prod_{\substack{c \in \pi \\ z_c=r}} H_r(\theta_c^*) \int w_c^{|c|} \exp\left\{-w_c\left(f(\theta_c^*) + \sum_{t=1}^T q_{t,r}\xi_t\right)\right\} \rho_r(w_c). \end{aligned} \quad (50)$$

Now we set  $f = 0$  to get the denominator.

$$\begin{aligned} \mathbb{E}[p(\pi, \{z_c, \theta_c^*\}, \{u_t\})\nu_r] & \propto \exp\left[\int \left\{\exp\left(-w \sum_{t=1}^T q_{t,r}\xi_t\right) - 1\right\} \rho_r(dw) H_r(d\theta)\right] \\ & \times \prod_{\substack{c \in \pi \\ z_c=r}} H_r(\theta_c^*) \kappa_{\rho_r}\left(|c|, \sum_{t=1}^T q_{t,r}\xi_t\right). \end{aligned} \quad (51)$$

Then dividing the numerator with the denominator yields

$$\begin{aligned} \mathbb{E}\left[e^{-\nu_r(f)}|\pi, \{z_c, \theta_c^*\}, \{u_t\}\right] &= \exp\left[\int (e^{-wf(\theta)} - 1) \exp\left(-w \sum_{t=1}^T q_{t,r} \xi_t\right) \rho_r(dw) H_r(d\theta)\right] \\ &\times \prod_{\substack{c \in \pi \\ z_c = r}} \int \frac{w_c^{|c|} \exp\{-w_c(f(\theta_c^*) + \sum_t q_{t,r} \xi_t)\}}{\kappa_{\rho_r}(|c|, \sum_t q_{t,r} \xi_t)} \rho_r(dw_c). \end{aligned} \quad (52)$$

This is the characteristic functional of a CRM with exponentially tilted Lévy measure  $\bar{\rho}_r$  and fixed atoms as defined in (42). The marginal likelihood can easily be obtained by similar computations since

$$p(\pi, \{z_c, \theta_c^*\}, \{\xi_t\}) = \mathbb{E}\left[p(\pi, \{z_c, \theta_c^*\}, \{\xi_t\}) | \{\nu_r\}\right]. \quad (53)$$

□

### 4.3 Posterior inference via marginal Gibbs sampling

We describe the marginal Gibbs sampling algorithm we used in our paper. Again, the same stuff can be found in [4]. Combined with the likelihood function  $L$ , the joint likelihood of mixture model is written as:

$$\begin{aligned} p(\mathbf{X}_{1:T}, \pi, \{z_c, \theta_c^*\}) &= \prod_{t=1}^T \frac{\xi_t^{n_t-1}}{\Gamma(n_t)} \prod_{r=1}^R \exp\left\{-\psi_{\rho_r}\left(\sum_{t=1}^T q_{t,r} \xi_t\right)\right\} \\ &\times \prod_{c \in \pi} \bar{q}_{cz_c} \kappa_{\rho_r}\left(|c|, \sum_{t=1}^T q_{t,z_c} \xi_t\right) L(\mathbf{X}^{(c)} | \theta_c^*) H_{z_c}(\theta_c^*). \end{aligned} \quad (54)$$

Suppose that we use NGGP with the same base measure  $H$  as Lévy measures for  $\nu_r$ :

$$H_r = H \quad (55)$$

$$\rho_r(w) = \frac{\alpha_r}{\Gamma(1-\sigma)} w^{-1-\sigma} e^{-\tau w} \quad (56)$$

$$\kappa_{\rho_r}(m, u) = \frac{\alpha_r \Gamma(m-\sigma)}{(u+\tau)^{m-\sigma} \Gamma(1-\sigma)} \quad (57)$$

$$\psi_{\rho_r}(u) = \frac{\alpha_r}{\sigma} \{(\tau+u)^\sigma - \tau^\sigma\}. \quad (58)$$

Here, for simplicity, we only varied the hyperparameter  $\alpha_r$  and fixed other hyperparameters  $\sigma$  and  $\tau$ . We also assume that  $H$  is a conjugate prior for  $L$ . Then we get

$$p(\mathbf{X}_{1:T}, \pi, \{z_c\}) = \prod_{t=1}^T \frac{\xi_t^{n_t-1}}{\Gamma(n_t)} \exp\left[-\sum_{r=1}^R \frac{\alpha_r}{\sigma} \left\{\left(\sum_{t=1}^T q_{t,r} \xi_t + \tau\right)^\sigma - \tau^\sigma\right\}\right] \prod_{c \in \pi} \frac{\bar{q}_{c,z_c} \alpha_{z_c} \Gamma(|c|-\sigma) p(\mathbf{X}^{(c)} | \mathcal{H}_c)}{(\sum_t q_{t,z_c} \xi_t + \tau)^{|c|-\sigma} \Gamma(1-\sigma)}. \quad (59)$$

#### Sampling $c$ and $z_c$

The cluster membership of each index  $(t, i)$  is sampled at each iteration.  $(t, i)$  may be allocated to a existing cluster  $c \in \pi_{\setminus ti}$  where  $\pi_{\setminus ti}$  is a partition of  $I_{1:T}$  except  $(t, i)$ . Also,  $(t, i)$  may create a new cluster which may come from one of the basis measures  $\{\nu_r\}_{r=1}^R$ .

$$p((t, i) \in c | \dots) \propto \frac{q_{t,z_c} (|c| - \sigma) p(\mathbf{X}^{(c \cup (t,i))} | \mathcal{H}_{c \cup (t,i)})}{(\sum_t q_{t,z_c} \xi_t + \tau) p(\mathbf{X}^{(c)} | \mathcal{H}_c)} \quad (60)$$

$$p((t, i) \in c \notin \pi_{\setminus ti}, z_c = r | \dots) \propto \frac{q_{t,r} \alpha_r p(\mathbf{X}^{(c \cup (t,i))} | \mathcal{H}_{c \cup (t,i)})}{(\sum_t q_{t,r} \xi_t + \tau)^{1-\sigma}}. \quad (61)$$



### Sampling $\xi_t$

The posterior distribution of  $\xi_t$  is written as

$$p(\xi_t | \dots) \propto \xi_t^{n_t-1} \exp \left\{ - \sum_{r=1}^R \frac{\alpha_r}{\sigma} \left( q_{t,r} \xi_t + \sum_{t' \neq t} q_{t',r} \xi_{t'} + \tau \right)^\sigma \right\} \prod_{c \in \pi} \left( q_{z_c,t} \xi_t + \sum_{t' \neq t} q_{z_c,t'} \xi_{t'} + \tau \right)^{\sigma-|c|}. \quad (62)$$

As in [7, 4], we sample  $\xi_t$  vial slice-sampling [8] in log domain. Let  $v_t = \log(\xi_t)$ . Then

$$\begin{aligned} \log p(v_t | \dots) &= n_t v_t - \sum_{r=1}^R \frac{\alpha_r}{\sigma} \left( q_{t,r} e^{v_t} + \sum_{t' \neq t} q_{t',r} \xi_{t'} + \tau \right)^\sigma \\ &\quad - \sum_{c \in \pi} (|c| - \sigma) \log \left( q_{t,z_c} e^{v_t} + \sum_{t' \neq t} q_{t',z_c} \xi_{t'} + \tau \right) + \text{const.} \end{aligned} \quad (63)$$

### Sampling $\alpha$

We place a Gamma prior on  $\alpha_r \sim \text{Gamma}(a_\alpha, b_\alpha)$ . Then

$$\alpha_r | \dots \sim \text{Gamma} \left( a_\alpha + \sum_{c \in \pi} \mathbb{I}[z_c = r], b_\alpha + \sum_{r=1}^R \frac{(\sum_t q_{t,r} \xi_t + \tau)^\sigma - \tau^\sigma}{\sigma} \right). \quad (64)$$

Hence, we can easily sample  $\alpha_r$  from Gamma distribution.

### Sampling $\tau$

We place a Gamma prior on  $\tau \sim \text{Gamma}(a_\tau, b_\tau)$ . Then

$$p(\tau | \dots) \propto \tau^{a_\tau-1} e^{-b_\tau \tau} \exp \left[ - \sum_{r=1}^R \frac{\alpha_r}{\sigma} \left\{ \left( \sum_{t=1}^T q_{t,r} \xi_t + \tau \right)^\sigma - \tau^\sigma \right\} \right] \prod_{c \in \pi} \left( \sum_{t=1}^T q_{t,z_c} \xi_t + \tau \right)^{\sigma-|c|}. \quad (65)$$

Again, as in [7, 4],  $\tau$  can easily be sampled via slice sampling in log domian. Let  $\xi = \log(\tau)$ .

$$\begin{aligned} \log p(\xi | \dots) &= a_\tau \xi - b_\tau e^\xi - \sum_{r=1}^R \frac{\alpha_r}{\sigma} \left\{ \left( \sum_{t=1}^T q_{t,r} \xi_t + e^\xi \right)^\sigma - e^{\xi \sigma} \right\} \\ &\quad - \sum_{c \in \pi} (|c| - \sigma) \log \left( \sum_{t=1}^T q_{t,z_c} \xi_t + e^\xi \right) + \text{const.} \end{aligned} \quad (66)$$

In practice, following [7], we just fixed  $\tau = 10^{-3}$ .

### Sampling $\sigma$

We place a Beta prior on  $\sigma \sim \text{Beta}(a_\sigma, b_\sigma)$ .

$$p(\sigma | \dots) \propto \sigma^{a_\sigma-1} (1-\sigma)^{b_\sigma-1} \exp \left[ - \sum_{r=1}^R \frac{\alpha_r}{\sigma} \left\{ \left( \sum_{t=1}^T q_{t,r} \xi_t + \tau \right)^\sigma - \tau^\sigma \right\} \right] \prod_{c \in \pi} \frac{\Gamma(|c| - \sigma)}{(\sum_t q_{t,z_c} \xi_t + \tau)^{|c| - \sigma} \Gamma(1 - \sigma)}, \quad (67)$$

which can easily be sampled using slice sampling, as in [7].

## References

- [1] J. F. C. Kingman. Completely random measures. *Pacific Journal of Mathematics*, 21(1):59–78, 1967.
- [2] L. F. James, A. Lijoi, and I. Prünster. Posterior analysis for normalized random measures with independent increments. *Scandinavian Journal of Statistics*, 36(1):76–97, 2009.
- [3] Y. W. Teh. Bayesian nonparametrics rough notes. 2012.
- [4] C. Chen, V. Rao, W. Buntine, and Y. W. Teh. Supplementary material for dependent normalized random measures. *Proceedings of the International Conference on Machine Learning (ICML)*, 2013.
- [5] J. F. C. Kingman. *Poisson Processes*. Oxford Science Publications, 1993.
- [6] C. Chen, V. Rao, W. Buntine, and Y. W. Teh. Dependent normalized random measures. In *Proceedings of the International Conference on Machine Learning (ICML)*, Atlanta, Georgia, USA, 2013.
- [7] S. Favaro and Y. W. Teh. MCMC for normalized random measure mixture models. *Statistical Science*, 28(3):335–359, 2013.
- [8] R. M. Neal. Slice sampling. *The Annals of Statistics*, 31(3):705–767, 2003.
